# Supplementary material for: Anxiety- rather than depression-like behavior is associated with adult neurogenesis in a female mouse model of higher trait anxiety- and comorbid depression-like behavior
Source: PubMed Central journal article supplement — Transl Psychiatry. 2012 Oct 16;2(10):e171–. doi: 10.1038/tp.2012.94 (PMC3565824; doi:10.1038/tp.2012.94), 2012-10-16
Supplement: tp201294x1.pdf [file tp201294x1.pdf]

## Supplementary Figures

Fig 1

HABs showed an anhedonic behavior in the sucrose preference test

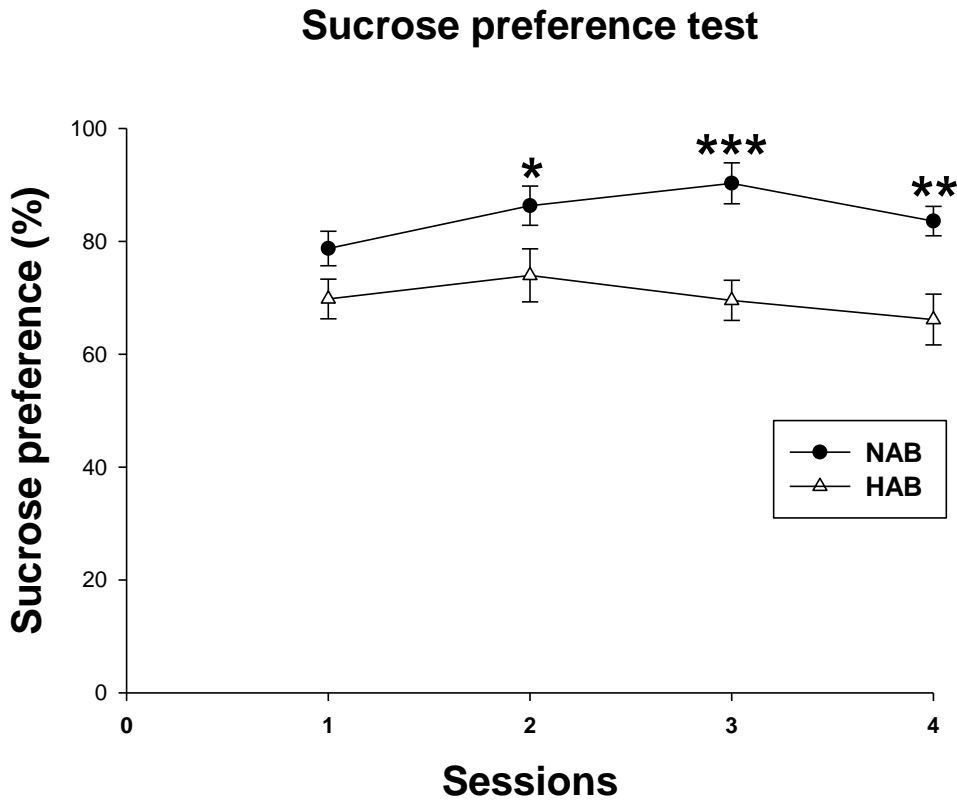

Fig 1. **Differential changes in sucrose test parameters in HABs and NABs.** Repeated measures ANOVA revealed a significant group effect ( $p < 0.001$ ). Duncan's post hoc test revealed that HABs showed a lower preference for sucrose in comparison to NABs in 3 out of 4 sessions. \* $p < 0.05$ , \*\*  $p < 0.01$ , \*\*\*  $p < 0.001$ .  $n = 9-12$  mice/ group. Data are represented as mean  $\pm$  s.e.m.
