# Supplementary material for: Anxiety- rather than depression-like behavior is associated with adult neurogenesis in a female mouse model of higher trait anxiety- and comorbid depression-like behavior
Source: PubMed Central journal article supplement — Transl Psychiatry. 2012 Oct 16;2(10):e171–. doi: 10.1038/tp.2012.94 (PMC3565824; doi:10.1038/tp.2012.94), 2012-10-16
Supplement: tp201294x2.pdf [file tp201294x2.pdf]

## Supplementary Figures

Fig 2

Chronic fluoxetine treatment had no effect on the anxiety-related behavior in HABs

### (a) Experimental paradigm

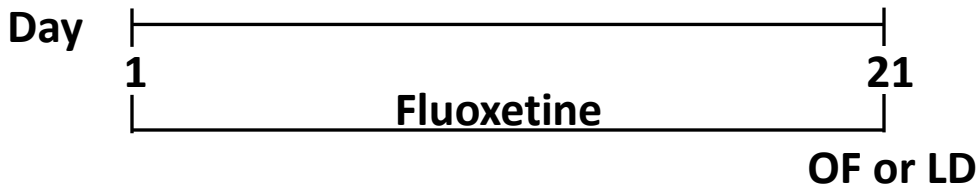

### (b) Open field test

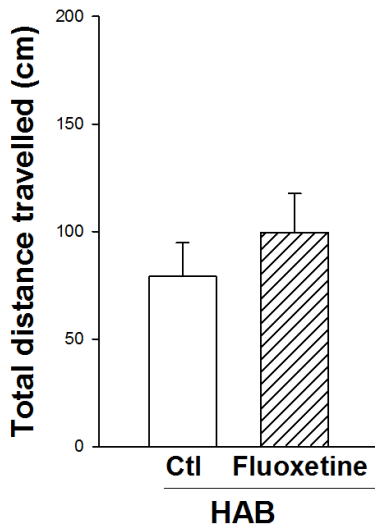

### (c) Light dark test

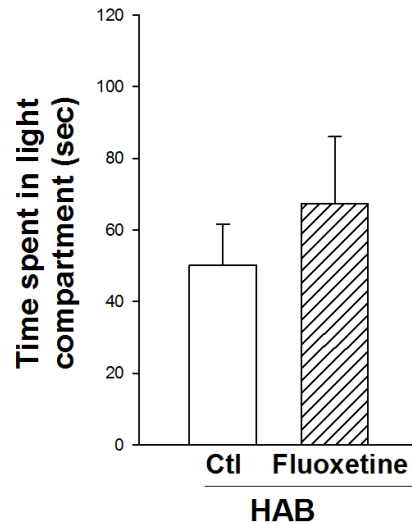

Fig 2. **Effect of chronic fluoxetine on the locomotor activity and anxiety-related behavior in HABs.** (a) Experimental paradigm (b) One way ANOVA revealed that there was no difference in the total distance travelled Ctl and fluoxetine treated HABs ( $p > 0.05$ ) in the open field test. (c) In addition, there was no significant difference between Ctl and fluoxetine treated HABs ( $p > 0.05$ ) in the time spent in the light compartment. Ctl: control,  $n = 9$  mice/ group. Data are represented as mean  $\pm$  s.e.m.
