# Supplementary material for: Anxiety- rather than depression-like behavior is associated with adult neurogenesis in a female mouse model of higher trait anxiety- and comorbid depression-like behavior
Source: PubMed Central journal article supplement — Transl Psychiatry. 2012 Oct 16;2(10):e171–. doi: 10.1038/tp.2012.94 (PMC3565824; doi:10.1038/tp.2012.94), 2012-10-16
Supplement: tp201294x3.pdf [file tp201294x3.pdf]

## Supplementary Figures

Fig 3

Sub-chronic fluoxetine treatment had an anxiogenic-like effect along with a reduction in neurogenesis in NABs in the light-dark test

### (a) Experimental paradigm

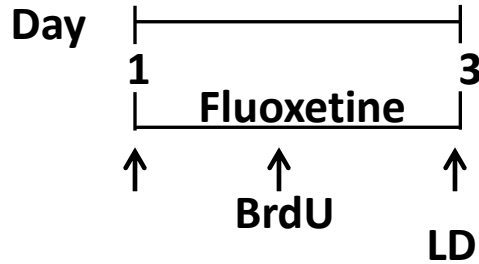

(b)

### Total distance travelled

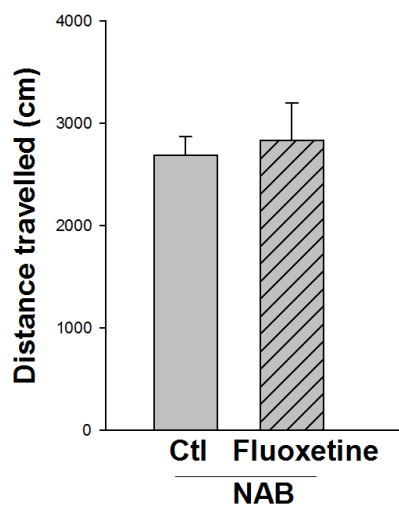

(c)

### Time spent in light compartment

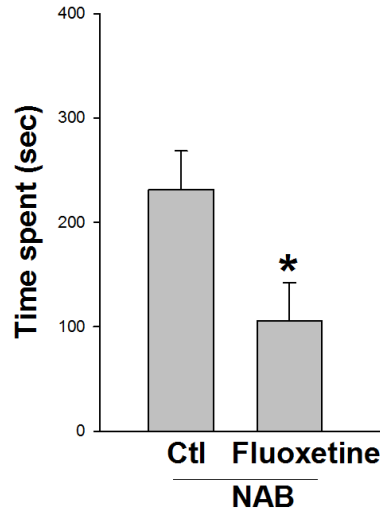

(d)

### Newly born cells

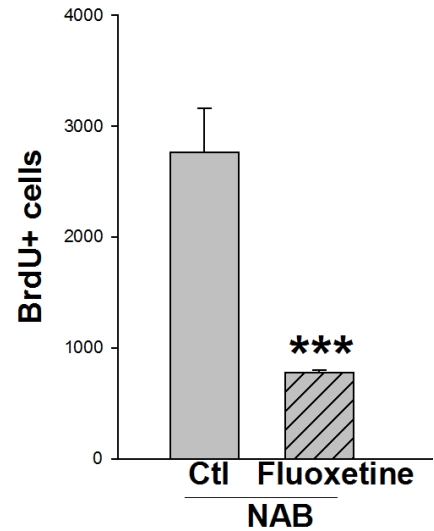

### (e) Immature neurons

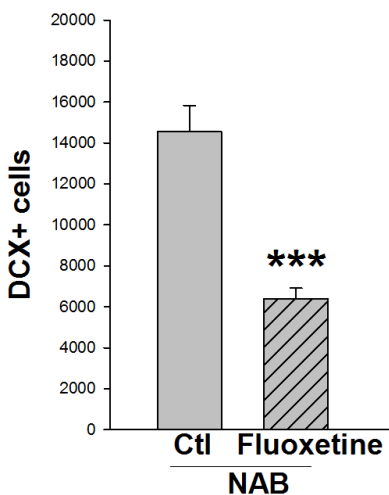

Fig 3. Effect of subchronic administration of fluoxetine on the anxiety-related behavior of NABs in the light dark test. (a) Experimental paradigm. (b) The total distance travelled was not different between the groups. (c) Fluoxetine treated NABs had a significantly lower number of entries in the light compartment. (d and e) Fluoxetine also decreased the BrdU and DCX positive cells in NABs \*\*\*  $p < 0.001$  NAB-Control vs NAB-fluoxetine (Ctl: control, LD: light dark test)  $n = 6$  mice/group. LD: Light-dark test. Data are represented as mean  $\pm$  s.e.m.
