# Supplementary material for: Anxiety- rather than depression-like behavior is associated with adult neurogenesis in a female mouse model of higher trait anxiety- and comorbid depression-like behavior
Source: PubMed Central journal article supplement — Transl Psychiatry. 2012 Oct 16;2(10):e171–. doi: 10.1038/tp.2012.94 (PMC3565824; doi:10.1038/tp.2012.94), 2012-10-16
Supplement: tp201294x4.pdf [file tp201294x4.pdf]

## Supplementary Figures

Fig 4

Chronic NK1RA or tianeptine did not have any effect on the locomotor activity in HABs in the open field test

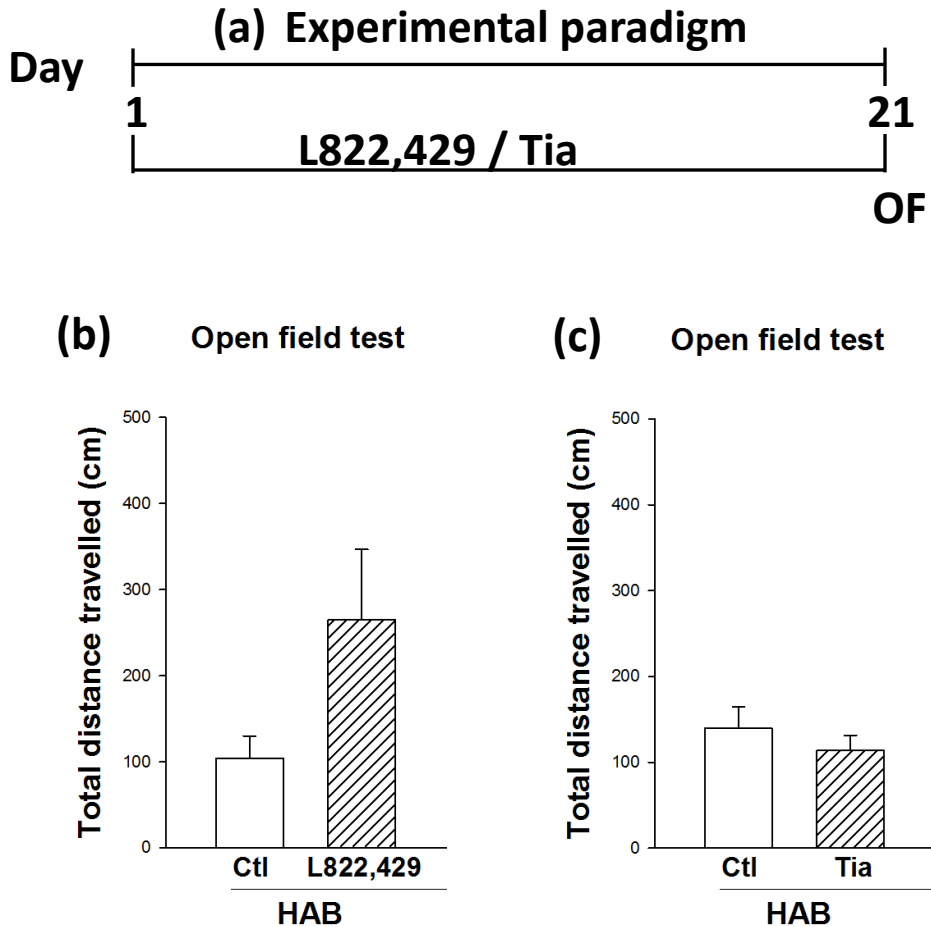

Fig 4. Effect of chronic administration of L822,429 / tia on the locomotor activity in open field test in HABs. (a) Experimental paradigm. One way ANOVA revealed that the total distance travelled was not different between (b) Ctl and L822,429 treated HABs ( $p > 0.05$ ) and (c) Ctl and Tia treated HABs ( $p > 0.05$ ). Ctl: control, Tia: tianeptine  $n = 6-9$  mice/ group. Data are represented as mean  $\pm$  s.e.m.
