# Supplementary material for: Anxiety- rather than depression-like behavior is associated with adult neurogenesis in a female mouse model of higher trait anxiety- and comorbid depression-like behavior
Source: PubMed Central journal article supplement — Transl Psychiatry. 2012 Oct 16;2(10):e171–. doi: 10.1038/tp.2012.94 (PMC3565824; doi:10.1038/tp.2012.94), 2012-10-16
Supplement: tp201294x5.pdf [file tp201294x5.pdf]

# Supplementary Figures

Fig 5

## NABs, but not HABs, displayed functional integration of newly born neurons

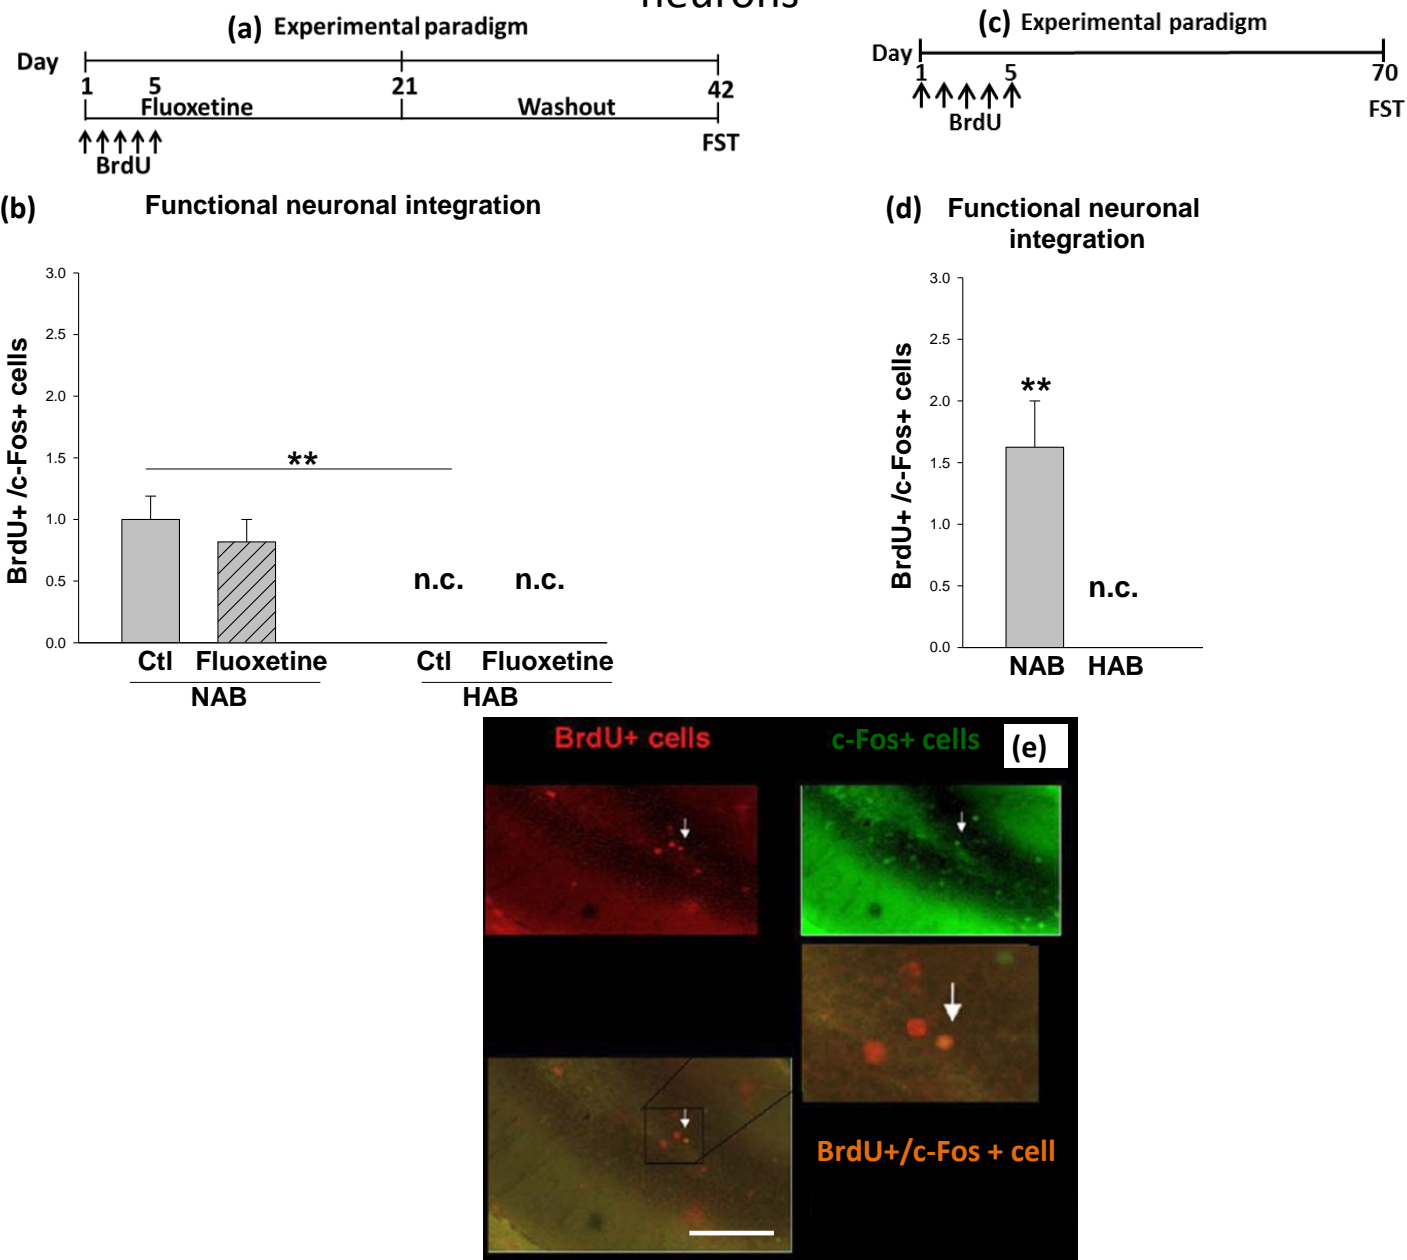

Fig 5. **BrdU+ cells were colocalized with c-Fos+ cells in NABs but not HABs.** (a) Experimental paradigm: BrdU was administered for 5 days and FST was conducted at the end of 6 weeks (42 days). (b) A few examples of BrdU+ cells which were colocalized with c-Fos+ cells were found, indicating activation of the newly born neurons in NABs but not HABs upon forced swim challenge. A 2-way ANOVA revealed that NABs showed a higher number of colocalizations ( $p < 0.01$  vs HABs). However, fluoxetine failed to alter the functional activation of newly born cells in either of the groups ( $p > 0.05$ ). (c) Experimental paradigm: BrdU was administered for 5 days and FST was conducted at the end of 10 weeks (70 days). (d) Prolonging the time period of integration of newly born cells to 10 weeks still did not reveal any example of BrdU/c-Fos colocalizations. Unpaired t-test showed that NABs had a higher number of BrdU/c-Fos colocalizations ( $p < 0.01$ , vs HABs). (e) An example of a BrdU+ cell also expressing c-Fos. Scale bar 600 μm. Magnified view in inset.  $**p < 0.01$ .  $n = 7-9$ /group, n.c.: no colabelings detected. Data are represented as mean + s.e.m.
